# Supplementary material for: Combining gene expression analysis of gastric cancer cell lines and tumor specimens to identify biomarkers for anti-HER therapies—the role of HAS2, SHB and HBEGF
Source: Springer Nature journal article supplement (doi:10.1186/s12885-022-09335-4), 2022-03-09
Supplement: MOESM1 [file 12885_2022_9335_MOESM1_ESM.pdf › 12885_2022_9335_MOESM1_ESM.pdf]

## Supplemental Tables

**Table S1: Number of plated cells**

| Experiment                | Cell lines         | Cell number                             |
|---------------------------|--------------------|-----------------------------------------|
| RNA extraction            | MKN1, MKN7, Hs746T | $1.7 \times 10^4$ cells/cm <sup>2</sup> |
|                           | NCI-N87            | $2 \times 10^4$ cells/cm <sup>2</sup>   |
| Transfection with siRNA   | MKN1               | $1.7 \times 10^4$ cells/cm <sup>2</sup> |
|                           | NCI-N87            | $2.2 \times 10^4$ cells/cm <sup>2</sup> |
| WST-1 proliferation assay | MKN1               | $6 \times 10^3$ cells/cm <sup>2</sup>   |
|                           | NCI-N87            | $12 \times 10^3$ cells/cm <sup>2</sup>  |

**Table S2: Number of down- and upregulated genes in MKN1 cells.**

MKN1 cells were treated with afatinib (Afa), trastuzumab (Tra), trastuzumab plus afatinib (Tra\_Afa), EGF, cetuximab (Cet) or EGF plus cetuximab (EGF\_Cet) for 4 hours (4 h) or 24 hours (24 h). A gene is defined as downregulated or upregulated if the log2FC after treatment is <-1 or >1 and the FDR is <0.05. Downregulated or upregulated refers to the first mentioned treatment in comparison to the second mentioned treatment.

| row | MKN1                     | downregulated | upregulated |
|-----|--------------------------|---------------|-------------|
| 1   | 24h_Afa vs. 24h_Tra_Afa  | 0             | 0           |
| 2   | 24h_Afa vs. 24h_untr     | 349           | 392         |
| 3   | 24h_Tra vs. 24h_Tra_Afa  | 372           | 383         |
| 4   | 24h_Tra vs. 24h_untr     | 0             | 0           |
| 5   | 24h_Tra_Afa vs. 24h_untr | 394           | 386         |
| 6   | 4h_Afa vs. 4h_Tra_Afa    | 0             | 0           |
| 7   | 4h_Afa vs. 4h_untr       | 121           | 33          |
| 8   | 4h_Tra vs. 4h_Tra_Afa    | 22            | 124         |
| 9   | 4h_Tra vs. 4h_untr       | 0             | 0           |
| 10  | 4h_Tra_Afa vs. 4h_untr   | 125           | 26          |
| 11  | 24h_Cet vs. 24h_EGF_Cet  | 1525          | 1127        |
| 12  | 24h_Cet vs. 24h_untr     | 132           | 119         |
| 13  | 24h_EGF vs. 24h_EGF_Cet  | 5             | 38          |
| 14  | 24h_EGF vs. 24h_untr     | 630           | 773         |
| 15  | 24h_EGF_Cet vs. 24h_untr | 336           | 209         |
| 16  | 4h_Cet vs. 4h_EGF_Cet    | 351           | 94          |
| 17  | 4h_Cet vs. 4h_untr       | 71            | 14          |
| 18  | 4h_EGF vs. 4h_EGF_Cet    | 4             | 33          |
| 19  | 4h_EGF vs. 4h_untr       | 39            | 264         |
| 20  | 4h_EGF_Cet vs. 4h_untr   | 3             | 25          |

**Table S3: Number of down- and upregulated genes in NCI-N87 cells.**

NCI-N87 cells were treated with afatinib (Afa), trastuzumab (Tra) or trastuzumab plus afatinib (Tra\_Afa) for 4 hours (4 h) or 24 hours (24 h). A genes is defined as downregulated or upregulated if the log2FC after treatment is <-1 or >1 and the FDR is <0.05. Downregulated or upregulated refers to the first mentioned treatment in comparison to the second mentioned treatment.

| row | NCI-N87                  | downregulated | upregulated |
|-----|--------------------------|---------------|-------------|
| 1   | 24h_Afa vs. 24h_Tra_Afa  | 0             | 0           |
| 2   | 24h_Afa vs. 24h_untr     | 4263          | 1954        |
| 3   | 24h_Tra vs. 24h_Tra_Afa  | 1751          | 4252        |
| 4   | 24h_Tra vs. 24h_untr     | 0             | 0           |
| 5   | 24h_Tra_Afa vs. 24h_untr | 4676          | 2031        |
| 6   | 4h_Afa vs. 4h_Tra_Afa    | 0             | 0           |

|    |                       |     |     |
|----|-----------------------|-----|-----|
| 7  | 4h_Afa vs. 4h_untr    | 316 | 256 |
| 8  | 4h_Tra vs. 4h_Tra_Afa | 351 | 403 |
| 9  | 4h_Tra vs. 4h_untr    | 0   | 0   |
| 10 | 4h_Tra_Afa_4h_untr    | 290 | 262 |

**Table S4: Number of down- and upregulated genes in MKN7 cells.**

MKN7 cells were treated with afatinib (Afa), trastuzumab (Tra) or trastuzumab plus afatinib (Tra\_Afa) for 4 hours (4 h) or 24 hours (24 h). A genes is defined as downregulated or upregulated if the log2FC after treatment is <-1 or >1 and the FDR is <0.05. Downregulated or upregulated refers to the first mentioned treatment in comparison to the second mentioned treatment.

| row | MKN7                     | downregulated | upregulated |
|-----|--------------------------|---------------|-------------|
| 1   | 24h_Afa vs. 24h_Tra_Afa  | 0             | 0           |
| 2   | 24h_Afa vs. 24h_untr     | 1695          | 966         |
| 3   | 24h_Tra vs. 24h_Tra_Afa  | 713           | 956         |
| 4   | 24h_Tra vs. 24h_untr     | 0             | 0           |
| 5   | 24h_Tra_Afa vs. 24h_untr | 1684          | 990         |
| 6   | 4h_Afa vs. 4h_Tra_Afa    | 0             | 0           |
| 7   | 4h_Afa vs. 4h_untr       | 405           | 216         |
| 8   | 4h_Tra vs. 4h_Tra_Afa    | 194           | 328         |
| 9   | 4h_Tra vs. 4h_untr       | 0             | 0           |
| 10  | 4h_Tra_Afa_4h_untr       | 429           | 247         |

**Table S5: Number of differentially expressed genes in untreated cell lines Hs746T, MKN1, NCI-N87 and MKN7.**

Gene expression in untreated (untr) cells was compared after 4 hours (4 h) or 24 hours (24 h) culture time. A gene is defined as differentially expressed if the log2FC is <-1 or >1 and the FDR is <0.05. Lower or higher expression refers to the first mentioned cell line in comparison to the second mentioned cell line.

|                                      | Lower expression | Higher expression |
|--------------------------------------|------------------|-------------------|
| Hs746T_4h_untr vs. MKN1_4h_untr      | 4013             | 6227              |
| Hs746T_4h_untr vs. MKN7_4h_untr      | 4319             | 4770              |
| Hs746T_4h_untr vs. NCI-N87_4h_untr   | 4898             | 5012              |
| MKN1_4h_untr vs. NCI-N87_4h_untr     | 5980             | 3786              |
| MKN1_4h_untr vs. MKN7_4h_untr        | 5184             | 3394              |
| MKN7_4h_untr vs. NCI-N87_4h_untr     | 4510             | 4216              |
| Hs746T_24h_untr vs. MKN1_24h_untr    | 3840             | 7258              |
| Hs746T_24h_untr vs. MKN7_24h_untr    | 4082             | 5324              |
| Hs746T_24h_untr vs. NCI-N87_24h_untr | 4696             | 5195              |
| MKN1_24h_untr vs. NCI-N87_24h_untr   | 7027             | 3784              |
| MKN1_24h_untr vs. MKN7_24h_untr      | 5771             | 3644              |
| MKN7_24h_untr vs. NCI-N87_24h_untr   | 4930             | 4079              |

**Table S6: Regulated genes after 4 h and 24 h cetuximab and EGF treatment in MKN1 cells.**

|              | MKN1_4h_EGF vs.<br>MKN1_4h_untr |          | MKN1_24h_EGF vs.<br>MKN1_24h_untr |          | MKN1_4h_Cet vs.<br>MKN1_4h_untr |          | MKN1_24h_Cet vs.<br>MKN1_24h_untr |          |
|--------------|---------------------------------|----------|-----------------------------------|----------|---------------------------------|----------|-----------------------------------|----------|
| Gene Symbol  | log2FC                          | FDR      | log2FC                            | FDR      | log2FC                          | FDR      | log2FC                            | FDR      |
| <i>SPRY4</i> | 1.6                             | 1.95E-04 | 2.0                               | 3.40E-07 | -2.8                            | 4.51E-11 | -2.8                              | 8.35E-11 |
| <i>FOSL1</i> | 1.2                             | 2.77E-03 | 2.1                               | 2.87E-10 | -1.8                            | 1.45E-06 | -2.4                              | 8.35E-11 |
| <i>DUSP6</i> | 1.9                             | 8.26E-05 | 1.9                               | 4.78E-06 | -2.5                            | 1.56E-07 | -3.0                              | 3.95E-10 |
| <i>MAFF</i>  | 1.1                             | 4.89E-05 | 1.4                               | 2.41E-09 | -1.5                            | 2.33E-08 | -1.6                              | 3.95E-10 |

|                   |     |          |      |          |      |          |      |          |
|-------------------|-----|----------|------|----------|------|----------|------|----------|
| <i>AC018629.1</i> | 1.1 | 1.77E-02 | 2.8  | 3.99E-13 | -1.9 | 1.39E-05 | -2.5 | 5.57E-09 |
| <i>PHLDA1</i>     | 1.5 | 5.86E-06 | 1.7  | 1.77E-08 | -2.2 | 1.20E-10 | -2.0 | 8.94E-09 |
| <i>ERRFI1</i>     | 1.8 | 7.03E-13 | 1.1  | 1.94E-06 | -1.3 | 2.46E-06 | -1.5 | 2.88E-08 |
| <i>MFSD2A</i>     | 1.3 | 3.94E-09 | 1.6  | 1.40E-13 | -1.6 | 1.82E-11 | -1.4 | 4.02E-08 |
| <i>TNS4</i>       | 1.2 | 5.62E-03 | 2.7  | 3.85E-14 | -2.0 | 3.54E-07 | -2.1 | 6.29E-08 |
| <i>EGR2</i>       | 1.9 | 5.77E-04 | -1.4 | 3.77E-03 | -1.9 | 1.64E-02 | -2.7 | 4.24E-07 |
| <i>SGK1</i>       | 1.5 | 5.66E-08 | 1.3  | 1.01E-06 | -1.7 | 1.51E-09 | -1.5 | 4.98E-07 |
| <i>AREG</i>       | 2.3 | 9.12E-06 | 2.0  | 1.68E-05 | -2.0 | 4.09E-04 | -2.6 | 9.93E-07 |
| <i>HMGA2</i>      | 1.4 | 2.02E-09 | 2.5  | 4.54E-29 | -1.5 | 7.73E-10 | -1.2 | 3.27E-06 |
| <i>EREG</i>       | 1.4 | 7.29E-03 | 2.0  | 2.65E-06 | -1.9 | 1.40E-04 | -2.2 | 4.38E-06 |
| <i>PTHLH</i>      | 2.3 | 2.50E-23 | 2.6  | 3.50E-30 | -1.3 | 1.52E-07 | -1.0 | 5.47E-05 |
| <i>MIR100HG</i>   | 1.6 | 4.21E-19 | 3.1  | 5.40E-58 | -1.5 | 1.82E-11 | -1.1 | 6.71E-05 |
| <i>IL11</i>       | 1.5 | 6.54E-09 | 2.3  | 3.12E-19 | -1.4 | 3.92E-06 | -1.2 | 8.33E-05 |
| <i>MYC</i>        | 1.3 | 7.35E-06 | 1.6  | 7.68E-09 | -1.4 | 4.52E-06 | -1.2 | 1.89E-04 |
| <i>PRR9</i>       | 2.1 | 2.11E-06 | 4.4  | 1.28E-21 | -1.4 | 1.93E-02 | -2.3 | 8.12E-04 |
| <i>CSF2</i>       | 2.7 | 5.42E-11 | 3.1  | 8.41E-12 | -1.9 | 1.66E-04 | -1.7 | 9.31E-03 |
| <i>IL8</i>        | 2.0 | 2.58E-09 | 1.9  | 3.91E-08 | -1.8 | 4.12E-07 | -1.1 | 2.03E-02 |
| <i>RGS4</i>       | 2.8 | 3.87E-14 | 3.5  | 1.26E-19 | -1.7 | 2.20E-04 | -1.1 | 2.58E-02 |

**Table S7: Regulated genes after 4 h and 24 h afatinib treatment in NCI-N87 and MKN1 cells.**

|                   | NCI-N87_4h_Afa vs.<br>NCI-N87_4h_untr |          | NCI-N87_24h_Afa vs.<br>NCI-N87_24h_untr |          | MKN1_4h_Afa vs.<br>MKN1_4h_untr |         | MKN1_24h_Afa vs.<br>MKN1_24h_untr |         |
|-------------------|---------------------------------------|----------|-----------------------------------------|----------|---------------------------------|---------|-----------------------------------|---------|
| Gene Symbol       | log2FC                                | FDR      | log2FC                                  | FDR      | log2FC                          | FDR     | log2FC                            | FDR     |
| <i>BMF</i>        | 3.5                                   | 3.2E-126 | 4.2                                     | 5.7E-184 | 1.5                             | 3.0E-04 | 1.8                               | 6.6E-07 |
| <i>F3</i>         | -2.7                                  | 3.7E-85  | -3.9                                    | 5.2E-161 | -1.8                            | 1.3E-11 | -1.8                              | 5.3E-12 |
| <i>SPRY4</i>      | -4.0                                  | 4.6E-79  | -6.4                                    | 2.9E-144 | -3.8                            | 2.9E-19 | -4.7                              | 1.7E-26 |
| <i>SPRED2</i>     | -1.4                                  | 4.2E-37  | -2.7                                    | 2.8E-126 | -1.2                            | 4.3E-13 | -1.6                              | 6.3E-22 |
| <i>TNS4</i>       | -2.9                                  | 1.7E-58  | -4.4                                    | 2.3E-123 | -2.5                            | 4.8E-11 | -2.8                              | 2.8E-14 |
| <i>SPRED1</i>     | -1.3                                  | 1.7E-23  | -2.7                                    | 1.1E-92  | -1.1                            | 1.2E-07 | -1.8                              | 6.0E-19 |
| <i>FOSL1</i>      | -3.1                                  | 3.1E-46  | -4.6                                    | 1.2E-89  | -2.3                            | 2.4E-11 | -2.8                              | 5.7E-16 |
| <i>EPHA2</i>      | -2.7                                  | 1.5E-67  | -3.1                                    | 2.3E-88  | -1.7                            | 1.9E-17 | -1.9                              | 9.0E-22 |
| <i>SLC20A1</i>    | -1.6                                  | 4.2E-37  | -2.3                                    | 5.6E-78  | -1.5                            | 1.1E-06 | -1.2                              | 1.1E-05 |
| <i>PLK3</i>       | -2.5                                  | 1.7E-59  | -2.9                                    | 8.0E-78  | -1.1                            | 1.4E-10 | -1.0                              | 4.2E-09 |
| <i>ENC1</i>       | -1.6                                  | 1.1E-35  | -2.4                                    | 1.9E-76  | -1.4                            | 8.3E-14 | -1.6                              | 2.0E-18 |
| <i>EREG</i>       | -1.9                                  | 1.1E-27  | -3.3                                    | 5.5E-72  | -2.3                            | 1.6E-06 | -2.9                              | 9.0E-11 |
| <i>DUSP7</i>      | -1.5                                  | 2.7E-26  | -2.4                                    | 7.9E-68  | -1.1                            | 2.2E-08 | -1.1                              | 2.7E-09 |
| <i>DUSP4</i>      | -3.4                                  | 4.3E-44  | -4.2                                    | 1.3E-63  | -2.5                            | 1.6E-18 | -3.2                              | 4.7E-27 |
| <i>LIF</i>        | -2.1                                  | 2.8E-39  | -2.6                                    | 2.4E-60  | -1.7                            | 1.4E-18 | -1.1                              | 3.8E-08 |
| <i>ETV5</i>       | -1.4                                  | 1.0E-06  | -4.8                                    | 3.4E-60  | -1.3                            | 2.1E-07 | -2.9                              | 8.4E-32 |
| <i>AC018629.1</i> | -2.0                                  | 9.6E-20  | -3.6                                    | 7.0E-60  | -2.2                            | 1.5E-07 | -3.3                              | 1.4E-15 |
| <i>ERRFI1</i>     | -1.5                                  | 8.4E-30  | -2.1                                    | 3.3E-56  | -1.6                            | 1.3E-09 | -1.9                              | 5.5E-15 |
| <i>ADORA2B</i>    | -1.6                                  | 1.1E-15  | -3.2                                    | 7.8E-56  | -1.0                            | 2.2E-11 | -1.3                              | 1.1E-18 |
| <i>DUSP6</i>      | -4.9                                  | 2.4E-35  | -5.8                                    | 4.2E-48  | -3.4                            | 7.0E-14 | -4.5                              | 4.4E-21 |

|                      |      |         |      |         |      |         |      |         |
|----------------------|------|---------|------|---------|------|---------|------|---------|
| <i>HBEGF</i>         | -1.3 | 9.4E-13 | -2.6 | 3.1E-47 | -1.2 | 9.3E-03 | -2.1 | 1.2E-08 |
| <i>CBARP</i>         | -1.4 | 9.6E-11 | -3.1 | 3.6E-45 | -1.1 | 7.6E-12 | -1.5 | 1.1E-19 |
| <i>AREG</i>          | -1.7 | 2.7E-18 | -2.7 | 9.7E-44 | -2.4 | 3.5E-06 | -3.5 | 8.6E-12 |
| <i>MYC</i>           | -2.2 | 8.8E-33 | -2.4 | 3.6E-39 | -1.9 | 5.8E-11 | -1.5 | 1.8E-07 |
| <i>MAFF</i>          | -1.8 | 1.1E-24 | -2.2 | 2.7E-37 | -1.9 | 1.4E-14 | -2.3 | 6.4E-20 |
| <i>PRAG1</i>         | -1.3 | 6.9E-18 | -1.9 | 6.3E-37 | -1.3 | 4.8E-14 | -1.1 | 2.8E-09 |
| <i>SPRY2</i>         | -1.5 | 2.9E-12 | -2.6 | 2.1E-35 | -1.4 | 3.1E-15 | -1.4 | 7.3E-15 |
| <i>STON1-GTF2A1L</i> | 1.8  | 3.3E-06 | 4.0  | 3.6E-34 | 1.6  | 2.4E-02 | 1.4  | 6.0E-03 |
| <i>AP005233.2</i>    | -3.0 | 4.9E-27 | -3.2 | 5.1E-32 | -1.4 | 2.4E-05 | -3.0 | 5.2E-21 |
| <i>IL8</i>           | -4.1 | 6.0E-23 | -5.0 | 2.5E-31 | -2.1 | 2.9E-09 | -1.5 | 3.1E-04 |
| <i>AC027117.2</i>    | 1.3  | 5.3E-11 | 2.1  | 1.7E-30 | 1.3  | 2.4E-02 | 1.1  | 2.0E-03 |
| <i>PHLDA1</i>        | -2.1 | 1.6E-25 | -2.2 | 4.5E-30 | -2.9 | 9.1E-19 | -2.6 | 2.6E-16 |
| <i>AL590560.1</i>    | 1.0  | 5.2E-07 | 1.9  | 2.5E-28 | 1.3  | 2.6E-03 | 1.1  | 2.9E-04 |
| <i>SPRY4-AS1</i>     | -1.4 | 1.0E-03 | -4.6 | 5.8E-28 | -1.4 | 1.1E-02 | -3.1 | 2.3E-11 |
| <i>MFSD2A</i>        | -2.0 | 9.1E-16 | -2.6 | 9.7E-28 | -1.9 | 3.9E-17 | -1.9 | 1.0E-15 |
| <i>DUSP5</i>         | -2.6 | 2.5E-17 | -3.1 | 1.6E-24 | -1.5 | 7.6E-06 | -1.7 | 1.0E-08 |
| <i>EGR1</i>          | -4.7 | 1.6E-15 | -5.5 | 2.8E-21 | -3.7 | 1.5E-18 | -5.0 | 1.2E-30 |
| <i>GPR3</i>          | -2.1 | 3.8E-12 | -3.1 | 4.3E-21 | -2.3 | 3.4E-16 | -2.0 | 4.9E-11 |
| <i>CSF2</i>          | -3.9 | 1.0E-19 | -4.8 | 2.7E-19 | -2.4 | 2.0E-07 | -1.6 | 7.1E-03 |
| <i>AC004585.1</i>    | -2.4 | 3.9E-10 | -3.3 | 1.4E-18 | -1.8 | 4.7E-08 | -2.6 | 2.2E-13 |
| <i>FOS</i>           | -3.2 | 1.6E-10 | -4.1 | 5.7E-17 | -1.4 | 9.4E-08 | -1.3 | 8.0E-08 |
| <i>IER3</i>          | -1.3 | 1.8E-06 | -2.0 | 1.6E-15 | -1.8 | 2.2E-06 | -2.0 | 4.4E-08 |
| <i>ANKRD1</i>        | -2.7 | 5.4E-17 | -1.1 | 6.1E-12 | -1.8 | 1.0E-04 | -1.4 | 9.9E-04 |
| <i>IL1</i>           | -1.9 | 9.4E-03 | -2.3 | 1.1E-04 | -2.0 | 4.3E-05 | -1.2 | 2.0E-02 |
| <i>LINC01629</i>     | -1.9 | 9.9E-04 | -2.0 | 1.9E-04 | -1.4 | 1.6E-02 | -2.8 | 1.4E-06 |

**Table S8: Correlation of gene expression/protein secretion measured by RNA sequencing, qPCR and ELISA.**

| Gene        | Cell line | RNA Seq /qPCR |            | RNA Seq/qPCR/ELISA |            |
|-------------|-----------|---------------|------------|--------------------|------------|
|             |           | Pearson       | p adjusted | Pearson            | p adjusted |
| <i>AREG</i> | MKN1      | 0.9877        | 0.0006     | 0.8252             | 0.054      |
| <i>AREG</i> | MKN7      | 0.9999        | 0.0186     | 0.9989             | 0.054      |
| <i>AREG</i> | Hs746T    | 0.4767        | 0.1922     | 0.2858             | 0.3644     |
| <i>AREG</i> | NCI-N87   | 0.9936        | 0.0509     | 0.9819             | 0.1011     |
| <i>EREG</i> | MKN1      | 0.9886        | 0.0006     |                    |            |
| <i>EREG</i> | MKN7      | 1.0000        | 0.0186     |                    |            |
| <i>EREG</i> | Hs746T    | -0.8841       | 0.9903     |                    |            |
| <i>EREG</i> | NCI-N87   | 1.0000        | 0.0186     |                    |            |
| <i>BMF</i>  | MKN1      | 0.9995        | 3.14E-06   |                    |            |
| <i>BMF</i>  | NCI-N87   | 0.9992        | 0.0371     |                    |            |
| <i>SHB</i>  | NCI-N87   | 0.9999        | 0.0186     |                    |            |
